# Supplementary material for: Low spinophilin expression enhances aggressive biological behavior of breast cancer
Source: PubMed Central journal article supplement (PMC4484449; doi:10.18632/oncotarget.3586), 2015-03-14
Supplement: oncotarget-06-11191-s001.pdf [file oncotarget-06-11191-s001.pdf]

## Low spinophilin expression enhances aggressive biological behavior of breast cancer

### Supplementary Material

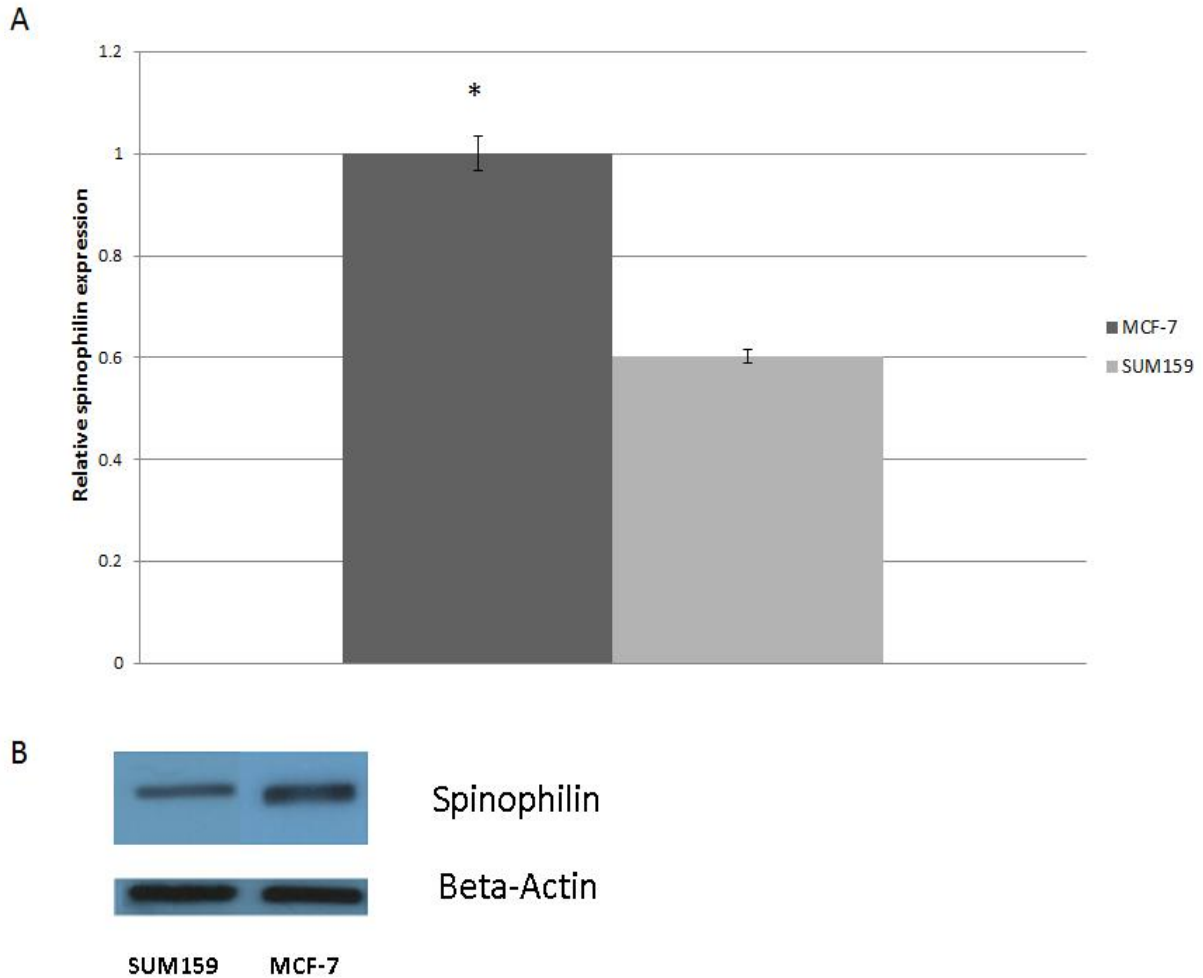

**Supplementary Figure 1: Spinophilin expression in MCF-7 and SUM159 cells.** The luminal A cell line MCF-7 shows higher spinophilin expression than the basal-like cell line SUM159 at mRNA (**A**) and protein (**B**) levels (1= SUM159, 2= MCF-7). Beta-actin was used as loading control.

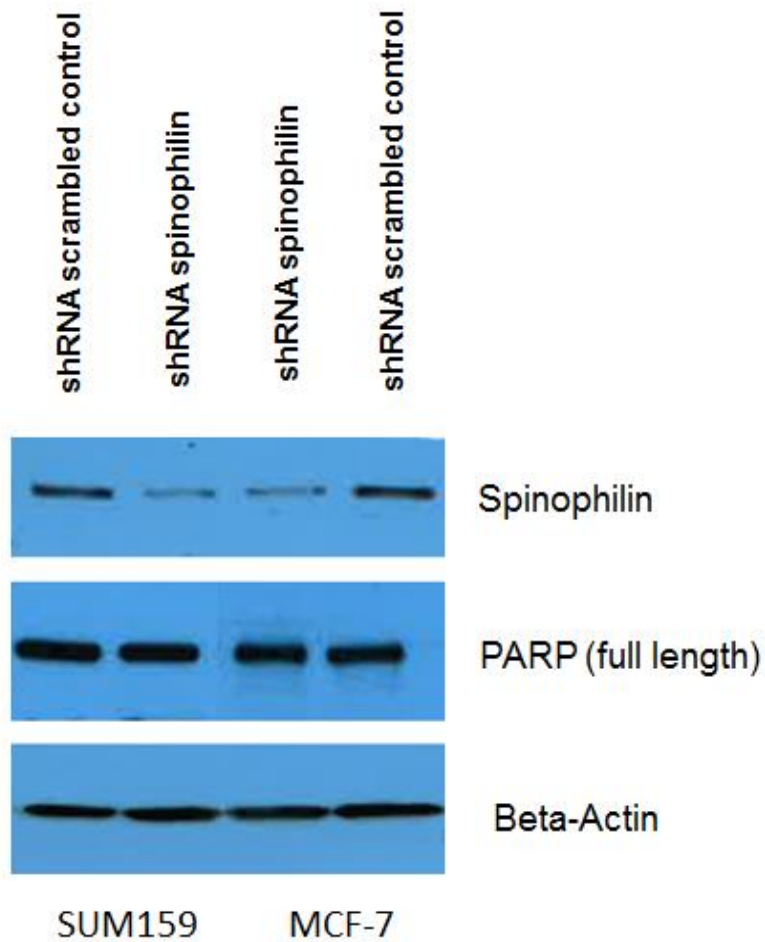

**Supplementary Figure 2: Spinophilin expression and PARP detection in shRNA spinophilin-silenced breast cancer cell lines.** Spinophilin protein levels are significantly reduced in both cell lines. For PARP staining, only the full length but not the cleaved PARP could be detected, indicating no differences in apoptosis rate. Beta-actin was used as loading control.

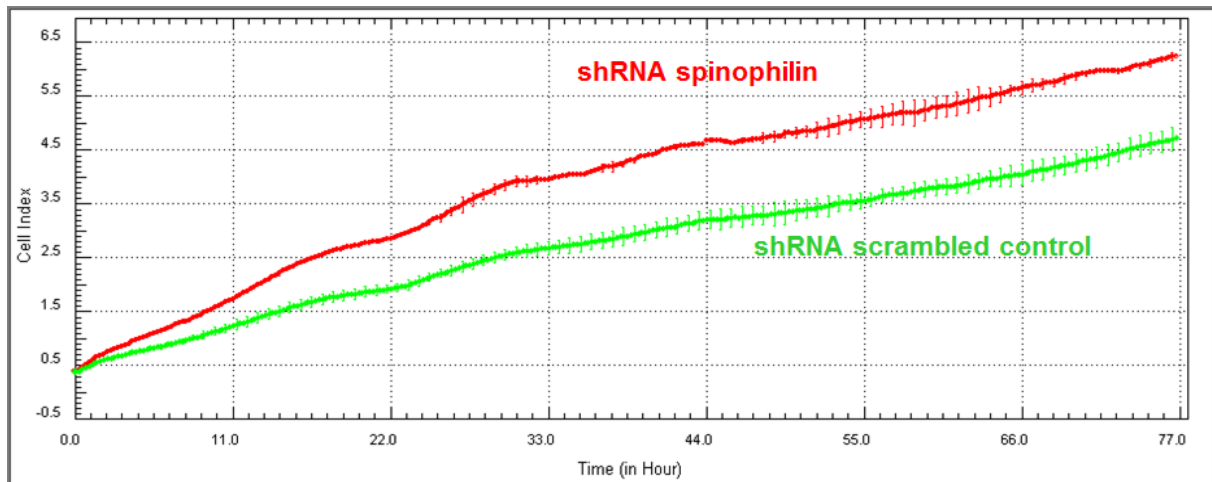

**Supplementary Figure 3: Increased growth rate in spinophilin-silenced cells confirmed by an independent second method.** Silencing of spinophilin increases cellular growth in SUM159 measured by xCELLigence. Real-time monitoring of the cell line SUM159 showed a significant higher cellular growth rates in spinophilin silenced cells (red) compared to control cells (green). The experiment was performed in triplicates and cell growth was monitored for 77 hours.

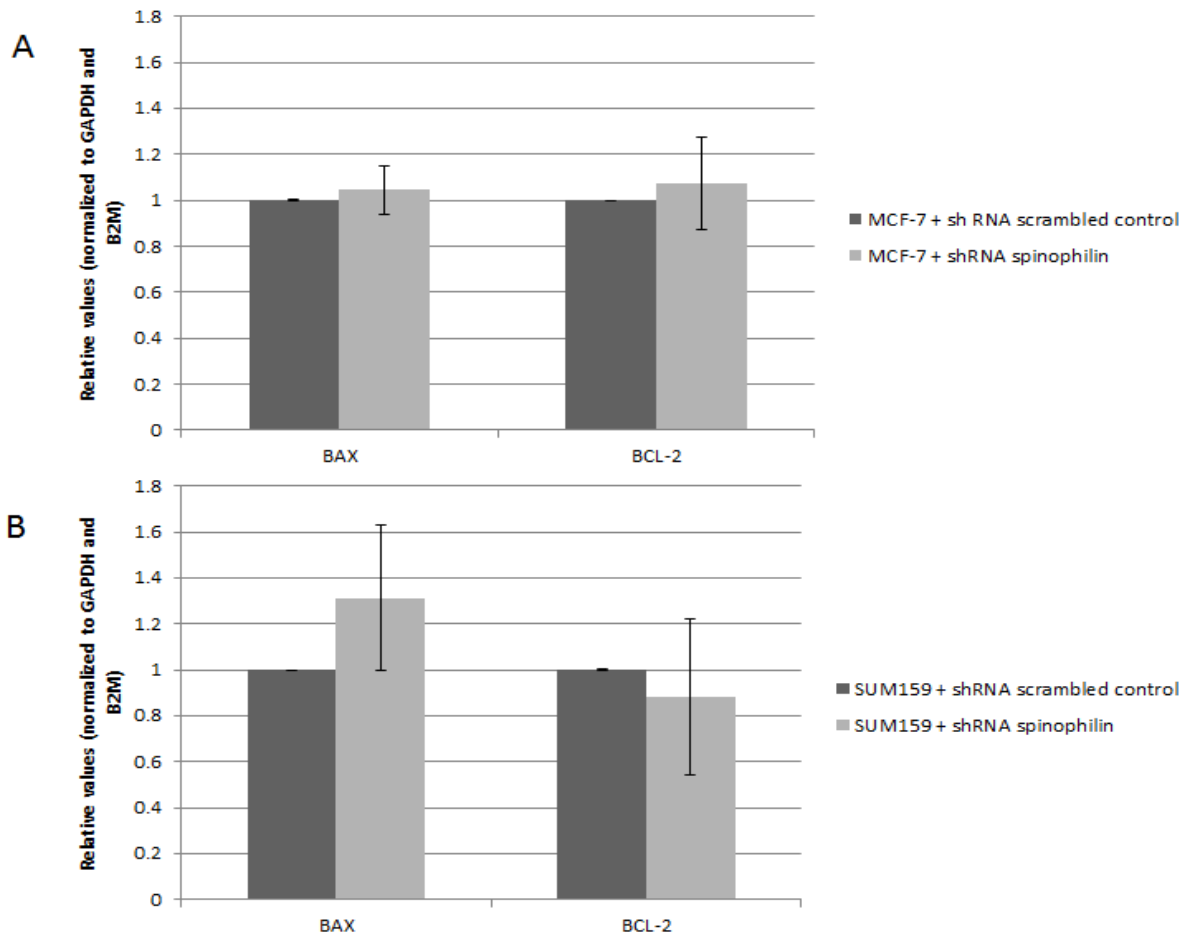

**Supplementary Figure 4: Silencing of spinophilin does not affect apoptosis-related gene expression.** Measurement of the pro-apoptotic Bax gene and the anti-apoptotic Bcl-2 gene by qRT-PCR showed no significant differences between spinophilin silenced cells and control cells. **A** shows the cell line MCF-7, **B** shows the cell line SUM159.

**Supplementary Table 1:** Gene specific primer sequences used for qRT-PCR (fw = forward primer, rv = reverse primer)

| Gene/primer ID | sequence                  |
|----------------|---------------------------|
| Bcl-2_fw       | GGAGGATTGTGGCCTTCTTG      |
| Bcl-2_rv       | GCCGGTTCAGGTAAGTCTAGTCAT  |
| Bax_fw         | CCTTTTCTACTTTGCCAGCAAAC   |
| Bax_rv         | GAGGCCGTCCCAACCAC         |
| GAPDH_fw       | AAGGTCGGAGTCAACGGATT      |
| GAPDH_rv       | ACCAGAGTTAAAAGCAGCCCTG    |
| B2M_fw         | TGCTGTCTCCATGTTTGATGTATCT |
| B2M_rv         | TCTCTGCTCCCCACCTCTAAGT    |
| SSX1_fw        | TGTCAACCACTGCTGCCAAC      |
| SSX1_rv        | CCAGGAGCAGTCTCACTTCAG     |
| SSX2_fw        | GGTGGAGCAGTCAGAACACA      |
| SSX2_rv        | CCTTTTGGGTCCCTGTTGT       |
| ITGBL1_fw      | CCCAGGCTTCAGGAAGTCTCT     |
| ITGBL1_rv      | CCAGCTCCTCAGAGATGGC       |
| RXFP2_fw       | TCGCTCACAGTGCTGTTTCT      |
| RXFP2_rv       | GCTAGACAGATCCAGTTCTCCT    |
| RYR2_fw        | TGCATGAAAGCATCAAACGCA     |
| RYR2_rv        | TCCACCACACAGCCAATCTC      |
| TSPAN7_fw      | CATCGGAACTGGCACCCTA       |
| TSPAN7_rv      | TGGCATAACAGTTTCAGCATCC    |
| NEO1_fw        | TCTTCCCACTGCCCATGTTT      |
| NEO1_rv        | TTCAGAGCTTGCTGGGACAG      |
| CSTA_fw        | ACATTAAGGTACGAGCAGGTG     |
| CSTA_rv        | ATGCTGCTAAAAGCCCGTCA      |
| AMY1A_fw       | CCTTCTGGGATGCTAGGCTG      |
| AMY1A_rv       | ATCTTGCCAACGGTAGCTT       |
| NAP1L3_fw      | AGGCACACTGGGAACGAAAT      |
| NAP1L3_rv      | GAGATGTACCGCAGCCGAAT      |

**Supplementary Table 2:** The list of 30 top up- and down-regulated genes when comparing spinophilin-silenced SUM159 cells versus control cells.

| Gene Symbol  | RefSeq          | Fold-Change<br>(upregulated in<br>SUM159 +spinophilin<br>shRNA) |
|--------------|-----------------|-----------------------------------------------------------------|
| ITGBL1       | NM_004791       | 6,40                                                            |
| SSX2         | NM_003147       | 6,32                                                            |
| GAGE12C      | NM_001098408    | 5,73                                                            |
| RXFP2        | NM_130806       | 4,72                                                            |
| GAGE2A       | NM_001127212    | 4,45                                                            |
| GAGE12H      | NM_001098410    | 4,11                                                            |
| GAGE12G      | NM_001098409    | 4,02                                                            |
| CXorf61      | ENST00000371894 | 3,85                                                            |
| LOC400655    | NR_034133       | 3,83                                                            |
| GAGE13       | NM_001098412    | 3,62                                                            |
| PAGE1        | NM_003785       | 3,53                                                            |
| GAGE12J      | NM_001098406    | 3,34                                                            |
| NID1         | NM_002508       | 3,24                                                            |
| SLC6A15      | NM_182767       | 3,23                                                            |
| CXorf69      | NM_001163438    | 3,16                                                            |
| LOC284801    | NR_040095       | 3,06                                                            |
| C10orf136    | NR_033923       | 3,00                                                            |
| MYBPC1       | NM_001254718    | 2,96                                                            |
| RYR2         | NM_001035       | 2,92                                                            |
| LOC100506823 | XR_108334       | 2,90                                                            |
| SCN9A        | NM_002977       | 2,88                                                            |
| SNORD93      | NR_003075       | 2,85                                                            |
| SSX4         | NM_005636       | 2,79                                                            |
| MST4         | NM_016542       | 2,73                                                            |
| SEPP1        | NM_001093726    | 2,68                                                            |
| LOC100287628 | ENST00000562396 | 2,61                                                            |
| SSX4B        | ENST00000376886 | 2,49                                                            |
| LOC100506835 | NR_038268       | 2,48                                                            |
| FLJ37505     | NR_033987       | 2,43                                                            |
| AMN1         | NM_001113402    | 2,40                                                            |

| Gene Symbol  | RefSeq          | Fold-Change<br>(downregulated in<br>SUM159 +spinophilin<br>shRNA) |
|--------------|-----------------|-------------------------------------------------------------------|
| LOC285505    | AK129723        | -2,69                                                             |
| TSPAN7       | NM_004615       | -2,59                                                             |
| LOC100505817 | NR_038340       | -2,53                                                             |
| NEO1         | ENST00000339362 | -2,40                                                             |
| CSTA         | NM_005213       | -2,37                                                             |
| AMY1A        | NM_004038       | -2,18                                                             |
| AMY2A        | NM_000699       | -2,18                                                             |
| ENKUR        | NM_145010       | -2,11                                                             |
| IL1A         | NM_000575       | -2,06                                                             |
| NAP1L3       | NM_004538       | -1,99                                                             |
| MUC15        | ENST00000436318 | -1,96                                                             |
| EPHA3        | NM_005233       | -1,91                                                             |
| XDH          | NM_000379       | -1,89                                                             |
| ELOVL4       | NM_022726       | -1,88                                                             |
| SH3BGR2      | NM_031469       | -1,86                                                             |
| RN5S241      | ENST00000391326 | -1,86                                                             |
| PDE3B        | NM_000922       | -1,86                                                             |
| LOC643923    | AK058066        | -1,84                                                             |
| CYP2J2       | ENST00000371204 | -1,77                                                             |
| P2RY1        | NM_002563       | -1,75                                                             |
| VCAN         | NM_004385       | -1,75                                                             |
| SERPINB5     | NM_002639       | -1,74                                                             |
| NETO1        | ENST00000327305 | -1,73                                                             |
| SLCO5A1      | NM_030958       | -1,72                                                             |
| FAM59A       | NM_001242409    | -1,71                                                             |
| PPP4R4       | NM_058237       | -1,70                                                             |
| HEPH         | ENST00000519389 | -1,69                                                             |
| KRT75        | ENST00000252245 | -1,68                                                             |
| PTX3         | NM_002852       | -1,67                                                             |
| SNORA68      | NR_000012       | -1,66                                                             |

### Supplementary Table 3: Pathway analysis discovered several pathways changed.

| Pathways                                                    | no of genes hit<br>against total<br>(human) | FC1.5 p0.005 up and down_233.txt<br>188 genes mapped (up and down) |                   |                       |          | FC1.5 p0.005 up_159.txt<br>110 genes mapped (up) |                   |                       |          | FC1.5 p0.005 down_74.txt<br>58 genes mapped (up) |                   |                       |          |
|-------------------------------------------------------------|---------------------------------------------|--------------------------------------------------------------------|-------------------|-----------------------|----------|--------------------------------------------------|-------------------|-----------------------|----------|--------------------------------------------------|-------------------|-----------------------|----------|
|                                                             |                                             | genes within<br>pathway                                            | expected<br>genes | expected<br>direction | pvalue   | genes within<br>pathway                          | expected<br>genes | expected<br>direction | pvalue   | genes within<br>pathway                          | expected<br>genes | expected<br>direction | pvalue   |
| Purine metabolism                                           | 7                                           | 2                                                                  | 0.05+             |                       | 1.40E-03 | 1                                                | 0.04+             |                       | 3.47E-02 | 1                                                | 0.02+             |                       | 1.85E-02 |
| p53 pathway by glucose deprivation                          | 21                                          | 2                                                                  | 0.16+             |                       | 1.17E-02 | 1                                                | 0.11+             |                       | 1.01E-01 | 1                                                | 0.06+             |                       | 5.44E-02 |
| Sulfate assimilation                                        | 2                                           | 1                                                                  | 0.02+             |                       | 1.53E-02 | 1                                                | 0.01+             |                       | 1.00E-02 | 0                                                | 0.01-             |                       | 9.95E-01 |
| Beta1 adrenergic receptor signaling pathway                 | 30                                          | 2                                                                  | 0.23+             |                       | 2.28E-02 | 2                                                | 0.15+             |                       | 1.03E-02 | 0                                                | 0.08-             |                       | 9.23E-01 |
| Beta2 adrenergic receptor signaling pathway                 | 30                                          | 2                                                                  | 0.23+             |                       | 2.28E-02 | 2                                                | 0.15+             |                       | 1.03E-02 | 0                                                | 0.08-             |                       | 9.23E-01 |
| Xanthine and guanine salvage pathway                        | 3                                           | 1                                                                  | 0.02+             |                       | 2.28E-02 | 1                                                | 0.02+             |                       | 1.50E-02 | 0                                                | 0.01-             |                       | 9.92E-01 |
| Oxytocin receptor mediated signaling pathway                | 43                                          | 2                                                                  | 0.33+             |                       | 4.40E-02 | 2                                                | 0.22+             |                       | 2.03E-02 | 0                                                | 0.11-             |                       | 8.92E-01 |
| Thyrotropin-releasing hormone receptor signaling pathway    | 45                                          | 2                                                                  | 0.35+             |                       | 4.77E-02 | 2                                                | 0.23+             |                       | 2.20E-02 | 0                                                | 0.12-             |                       | 8.87E-01 |
| Muscarinic acetylcholine receptor 1 and 3 signaling pathway | 46                                          | 2                                                                  | 0.35+             |                       | 4.98E-02 | 2                                                | 0.23+             |                       | 2.30E-02 | 0                                                | 0.12-             |                       | 8.85E-01 |
| 5HT2 type receptor mediated signaling pathway               | 50                                          | 2                                                                  | 0.39+             |                       | 5.75E-02 | 2                                                | 0.25+             |                       | 2.38E-02 | 0                                                | 0.13-             |                       | 8.75E-01 |
| Adenine and hypoxanthine salvage pathway                    | 6                                           | 1                                                                  | 0.05+             |                       | 4.65E-02 | 0                                                | 0.03-             |                       | 9.70E-01 | 1                                                | 0.02+             |                       | 1.58E-02 |
| Axon guidance mediated by semaphorins                       | 19                                          | 1                                                                  | 0.15+             |                       | 1.36E-01 | 0                                                | 0.1-              |                       | 9.09E-01 | 1                                                | 0.05+             |                       | 4.93E-02 |
| P53 pathway feedback loops 1                                | 7                                           | 1                                                                  | 0.05+             |                       | 5.25E-02 | 0                                                | 0.04-             |                       | 9.66E-01 | 1                                                | 0.02+             |                       | 1.85E-02 |
| p53 pathway                                                 | 81                                          | 2                                                                  | 0.62+             |                       | 1.30E-01 | 0                                                | 0.41-             |                       | 6.64E-01 | 2                                                | 0.22+             |                       | 1.99E-02 |
